# Supplementary material for: Induction of epithelial-mesenchymal transition (EMT) by Beclin 1 knockdown via posttranscriptional upregulation of ZEB1 in thyroid cancer cells
Source: PubMed Central journal article supplement (PMC5342558; doi:10.18632/oncotarget.12217), 2016-09-23
Supplement: oncotarget-07-70364-s001.pdf [file oncotarget-07-70364-s001.pdf]

## **Induction of epithelial-mesenchymal transition (EMT) by Beclin 1 knockdown via posttranscriptional upregulation of ZEB1 in thyroid cancer cells**

**Supplementary Materials**

**Supplementary Table S1: Differentially Expressed mRNAs (pass volcano plot).** See Supplementary\_ Table\_S1
